# Supplementary material
Source: PubMed Central journal article supplement (PMC2776459)
Supplement: 0904407106_0904407106SI.pdf [file 0904407106_0904407106SI.pdf]

# Supporting Information

Das et al. 10.1073/pnas.0904407106

## SI Materials and Methods

**Secondary Structure Definition.** Only residues in the regular secondary structures are used for rmsd calculation for the NMR cases:

Gb1 secondary elements: 18, 12–20, 23–33, 44–46, 51–55, 58–64, 69–75, 79–89, 98–102, 107–

Gb1 secondary elements: 1–8, 12–20, 23–33, 44–46, 51–55, 58–64, 69–75, 79–89, 98–102, 107–111

NS1 secondary elements: 3–24, 31–49, 54–70, 203–224, 231–249, 254–270

Gr83 secondary elements: 3–16, 26–32, 41–54, 64–70

McR1 secondary elements: 5–31, 37–62, 68–94, 100–125

HR2106 secondary elements: 2–11, 17–24, 29–31, 36–60, 66–73, 77–83, 86–92, 98–107, 113–120, 125–127, 132–156, 162–169, 173–179, 182–188

Sft1 secondary elements: 10–31, 35–50, 210–231, 235–250

Atc0223 secondary elements: 3–9, 13–20, 24–28, 35–48, 53–56, 65–71, 75–82, 86–90, 97–110, 115–118

**Availability.** The code is freely available to academic users at [www.rosettacommons.org](http://www.rosettacommons.org) in release Rosetta 2.3.0. The following command line carried out the protocol described above, here exemplifying the simulation of a C4 and D2 tetramer:

```
rosetta.exe xx pdb1 _ -output_silent_gz -read_all_chains -randomize1 -symm_type cn -pose_fold_and_dock -docking_pose_symmetry -nstruct 1 -pose1 -slide_contact_frequency 0.01 -rigid_body_frequency 0.01 -rigid_body_cycles 100 -new_centroid_packing -rg_reweight 0.0001 -move_anchor_points -monomer_input -pose_relax -pose_relax_fragment_moves -increase_cycles 1 -output_chi_silent -stringent_relax -ex1 -ex2 -vary_omega -omega_weight 0.5 -docking_pose_symm_full -combinatorial_rms_sym -pose_symm_jump_moves_during_relax -pose_symm_n_monomers 4 -n crystal.pdb1.native.pdb
```

```
rosetta.exe xx 1fe6 _ -output_silent_gz -read_all_chains -randomize1 -symm_type dn -pose_fold_and_dock -docking_pose_symmetry -nstruct 30 -pose1 -slide_contact_frequency 0.01 -rigid_body_frequency 0.01 -rigid_body_cycles 100 -new_centroid_packing -rg_reweight 0.0001 -move_anchor_points -monomer_input -pose_relax -pose_relax_fragment_moves -increase_cycles 1 -output_chi_silent -stringent_relax -ex1 -ex2 -vary_omega -omega_weight 0.5 -docking_pose_symm_full -combinatorial_rms_sym -pose_symm_jump_moves_during_relax -pose_symm_n_monomers 4 -n crystal.pdb1.native.pdb
```

```
d_packing -rg_reweight 0.0001 -move_anchor_points -monomer_input -pose_relax -pose_relax_fragment_moves -increase_cycles 1 -output_chi_silent -stringent_relax -ex1 -ex2 -vary_omega -omega_weight 0.5 -docking_pose_symm_full -combinatorial_rms_sym -pose_symm_jump_moves_during_relax -dn_twist_angle 5.0 -dn_twist_rings -pose_symm_n_monomers 4 -n pdb1.native.pdb
```

In Rosetta 3.1 the following command line exemplifies the simulation of a C3 system:

```
minirosetta.exe -run:protocol broker -broker:setup setup_init.tpb -nstruct 1 -out:file:scorefile score.fsc -database ./minirosetta_database -file:frag3 3mer_fragment_file -file:frag9 9mer_fragment_file -in:file:fasta pdb.fasta -symmetry:symmetry_definition ./sym_def_trimer.dat -out:file:silent pdb_name.out -out:file:silent_struct_type binary -relax:fast -relax:jump_move -symmetry:initialize_rigid_body_dofs -fold_and_dock::rotate_anchor_to_x -rg_reweight 0.01 -run:reinitialize_mover_for_each_job
```

where setup\_init.tpb contains:  
CLAIMER FoldandDockClaimer  
END-CLAIMER

And sym\_def\_trimer.dat contains:  
symmetry\_name c3  
subunits 3  
recenter  
number\_of\_interfaces 1  
E = 3\*VRT0001 + 3\*(VRT0001:VRT0002)  
anchor\_residue 17  
virtual\_transforms.start  
start -1,0,0 0,1,0 0,0,0  
rot Rz 3  
virtual\_transforms.stop  
connect\_virtual JUMP1 VRT0001 VRT0002  
connect\_virtual JUMP2 VRT0002 VRT0003  
set\_dof BASEJUMP x(50) angle\_x(360) angle\_y(360)  
angle\_z(360)

1. Bradley P, Misura KM, Baker D (2005) Toward high-resolution de novo structure prediction for small proteins. *Science* 309:1868–1871.

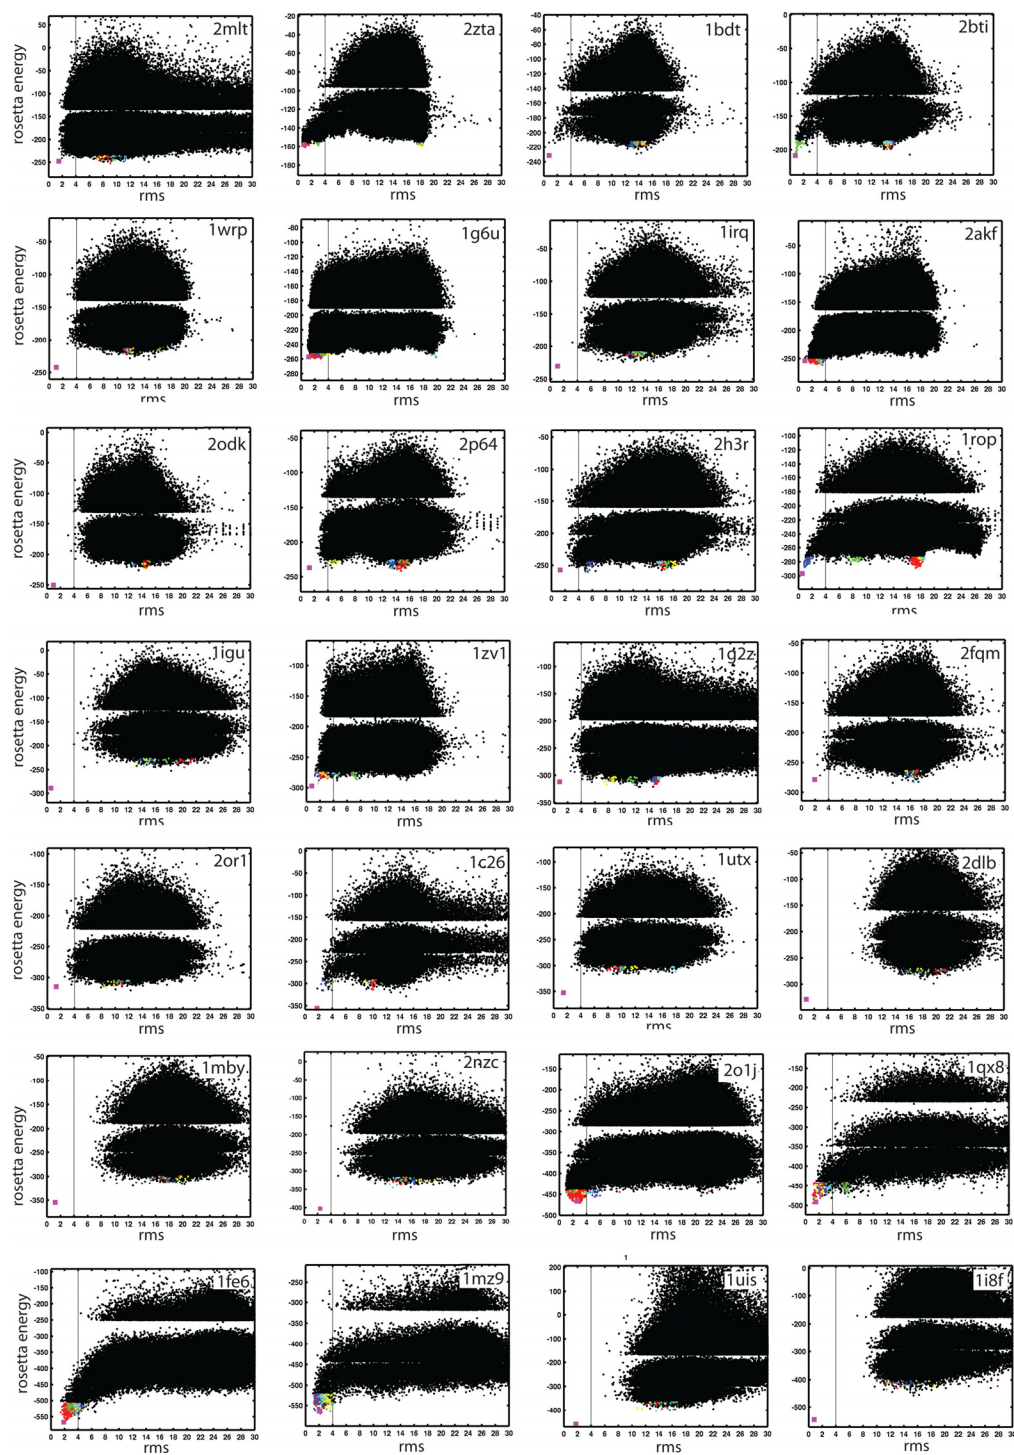

**Fig. S1.** Energy landscapes for proteins in the crystal structure benchmark. Rosetta all-atom energy (y axis) is plotted against  $C^{\alpha}$  rmsd (x axis) for models generated with the fold-and-dock protocol. Colored points represent the five most populous clusters among the lowest energy models (first, red; second, green; third, blue; fourth, yellow; and fifth, cyan). Violet square, Rosetta all-atom energy of native structure after all-atom refinement. Two horizontal striations evident in each plot are due to early termination of runs that failed to pass 50th percentile cutoffs at intermediate stages of full-atom refinement, a strategy that reduces computational expense (1).

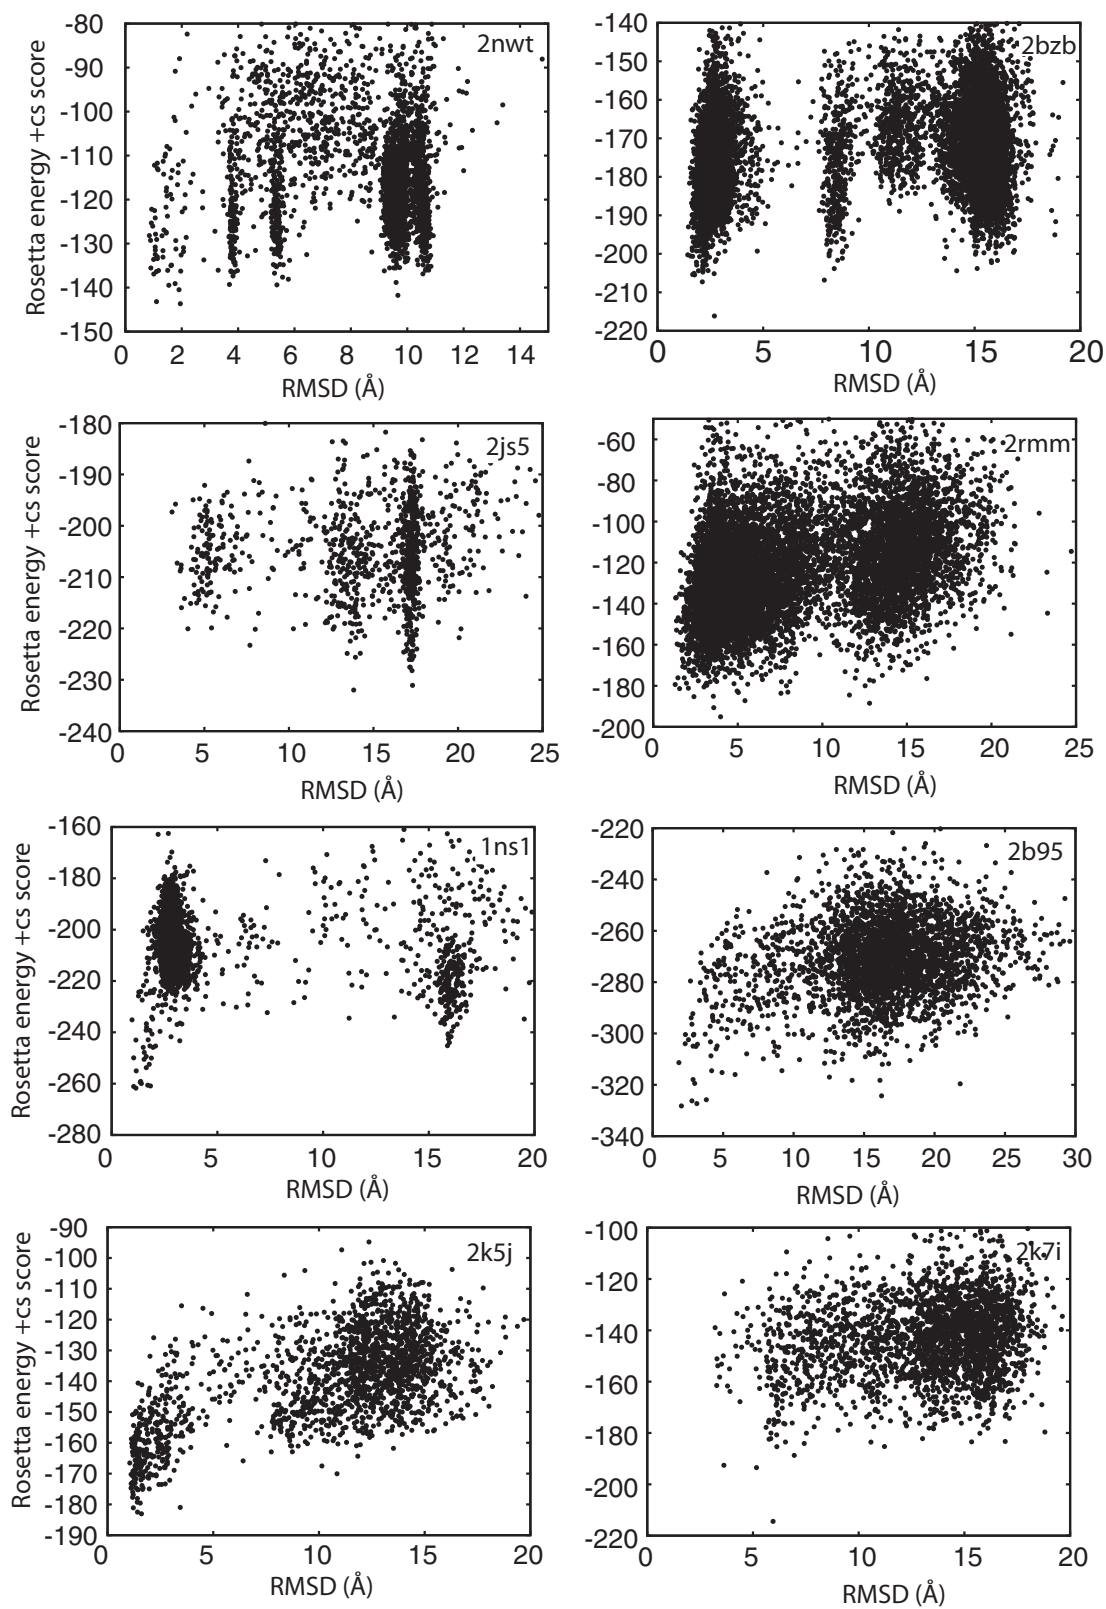

**Fig. S2.** Energy landscapes for proteins in the NMR structure benchmark. Rosetta all-atom energy + chemical shift score (y axis) is plotted against C<sup>α</sup> rmsd (x axis) for models generated with the fold-and-dock protocol using backbone fragments generated with chemical shifts.

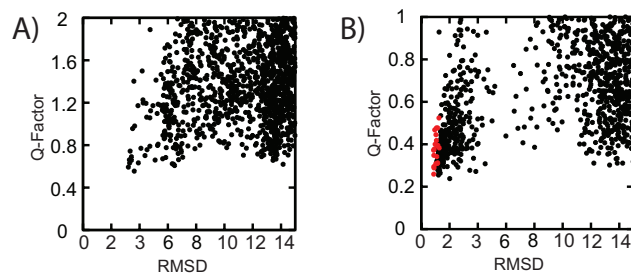

**Fig. S3.** Correlation between quality ( $Q$ )-factor (agreement with residual dipolar coupling data) and  $C^\alpha$  rmsd from the native structure for low-energy Rosetta models. (A) 2k7i. (B) 2k5j.  $Q$ -factors for the 20 conformers in the NMR ensemble are plotted in red.

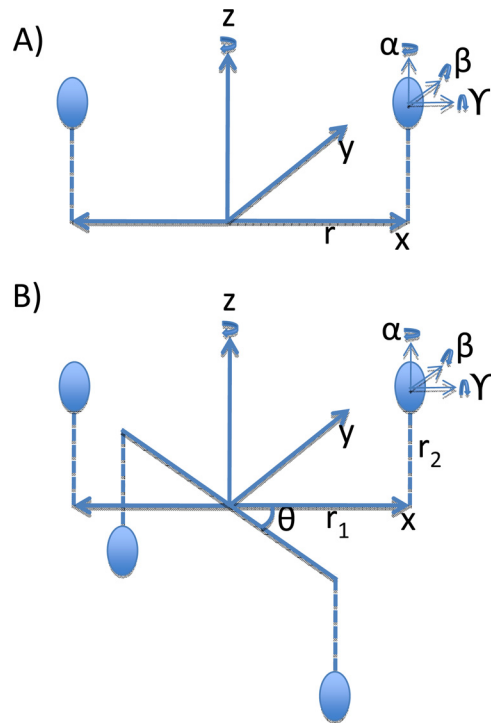

**Fig. 54.** Coordinate system used in the fold-and-dock simulation. (A) In a simulation of cyclical symmetry, there are four symmetrical degrees of freedom to sample: three rotational ( $\alpha$ ,  $\beta$ , and  $\gamma$ ) and one translational ( $r$ ). (B) In a simulation of dihedral symmetry (represented here by a D2 system), there are six degrees of freedom to sample: four rotational ( $\alpha$ ,  $\beta$ ,  $\gamma$ , together with  $\theta$ ) and two translational ( $r_1$  and  $r_2$ ).

**Table S1. Phasing results using models from traditional Rosetta modeling of single chains and from the new fold-and-dock protocol**

| Modeled protein PDB ID | Structure factors* | Space group                                   | No. molecules in asymm. unit | No. residues in asymm. unit | De novo models of single chains |                                                         | Fold-and-dock models, monomers |                                                         | Fold-and-dock models, complexes |                                                         |
|------------------------|--------------------|-----------------------------------------------|------------------------------|-----------------------------|---------------------------------|---------------------------------------------------------|--------------------------------|---------------------------------------------------------|---------------------------------|---------------------------------------------------------|
|                        |                    |                                               |                              |                             | Max. TFZ score <sup>†</sup>     | Frac. Residues built and sequence assigned <sup>‡</sup> | Max. TFZ score <sup>†</sup>    | Frac. Residues built and sequence assigned <sup>‡</sup> | Max. TFZ score <sup>†</sup>     | Frac. Residues built and sequence assigned <sup>‡</sup> |
| 1c26                   | 1aie               | P422                                          | 1                            | 31                          | 5.0                             | —                                                       | 5.6                            | 0.84                                                    | 0.0                             | —                                                       |
| 1fe6                   | 1ybk               | P3 <sub>1</sub> 21                            | 4                            | 208                         | 6.5                             | —                                                       | 6.1                            | —                                                       | 10.8                            | 0.86                                                    |
| 1g2z                   | 1g2z               | P2 <sub>1</sub> 2 <sub>1</sub> 2              | 2                            | 64                          | 5.0                             | —                                                       | 5.5                            | —                                                       | —                               | —                                                       |
| 1g6u                   | 1g6u               | P2 <sub>1</sub> 3                             | 2                            | 96                          | 5.8                             | —                                                       | 6.1                            | —                                                       | 8.2                             | 0.88                                                    |
| 1i8f                   | 1i8f               | C2                                            | 7                            | 567                         | 5.3                             | —                                                       | 5.6                            | —                                                       | 5.9                             | —                                                       |
| 1igu                   | 1igu               | P65                                           | 2                            | 124                         | 5.9                             | —                                                       | 5.9                            | —                                                       | 5.2                             | —                                                       |
| 1mby                   | 1mby               | P3 <sub>2</sub> 12                            | 2                            | 176                         | 6.0                             | —                                                       | 5.8                            | —                                                       | 5.4                             | —                                                       |
| 1qx8                   | 1qx8               | C2                                            | 2                            | 116                         | 5.6                             | —                                                       | 11.5                           | 0.75                                                    | —                               | —                                                       |
| 1rop                   | 2iji               | P3 <sub>1</sub> 21                            | 1                            | 63                          | 8.0                             | 0.62                                                    | 10.6                           | 0.89                                                    | —                               | —                                                       |
| 1uis                   | 1uis               | P6 <sub>5</sub> 22                            | 2                            | 462                         | 7.0                             | —                                                       | 6.8                            | —                                                       | —                               | —                                                       |
| 1utx                   | 1utx               | P4 <sub>1</sub>                               | 2                            | 132                         | 6.3                             | —                                                       | 6.1                            | —                                                       | 5.1                             | —                                                       |
| 1wrp                   | 1p6z               | P2 <sub>1</sub>                               | 2                            | 214                         | 6.4                             | —                                                       | 6.2                            | —                                                       | 4.9                             | —                                                       |
| 1zv1                   | 1zv1               | P2 <sub>1</sub> 2 <sub>1</sub> 2 <sub>1</sub> | 2                            | 130                         | 6.1                             | —                                                       | 6.2                            | —                                                       | 21.6                            | 0.75                                                    |
| 2akf                   | 2akf               | P1                                            | 3                            | 96                          | 5.7                             | —                                                       | 5.2                            | —                                                       | 4.7                             | —                                                       |
| 2bti                   | 2bti               | P4 <sub>3</sub> 22                            | 2                            | 126                         | 6.2                             | —                                                       | 6.3                            | —                                                       | 12.7                            | 0.79                                                    |
| 2dlb                   | 2dlb               | P2 <sub>1</sub> 2 <sub>1</sub> 2 <sub>1</sub> | 2                            | 160                         | 6.4                             | —                                                       | 6.0                            | —                                                       | 6.0                             | —                                                       |
| 2fqm                   | 2fqm               | P4 <sub>1</sub> 2 <sub>1</sub> 2              | 6                            | 450                         | 5.9                             | —                                                       | 5.2                            | —                                                       | 5.0                             | —                                                       |
| 2h3r                   | 2h3r               | P2                                            | 4                            | 440                         | 8.2                             | —                                                       | 7.3                            | —                                                       | 8.8                             | —                                                       |
| 2mlt                   | 2mlt               | C222 <sub>1</sub>                             | 2                            | 52                          | 8.9                             | —                                                       | 7.3                            | —                                                       | —                               | —                                                       |
| 2nzc                   | 2nzc               | C222 <sub>1</sub>                             | 4                            | 344                         | —                               | —                                                       | 4.6                            | —                                                       | 4.1                             | —                                                       |
| 2o1j                   | 2o1j               | C222 <sub>1</sub>                             | 4                            | 208                         | —                               | —                                                       | 11.6                           | 0.25                                                    | 11.9                            | 0.52                                                    |
| 2odk                   | 2odk               | C2                                            | 4                            | 356                         | 6.0                             | —                                                       | 6.0                            | —                                                       | 5.5                             | —                                                       |
| 2p64                   | 2p64               | P4 <sub>3</sub> 2 <sub>1</sub> 2              | 2                            | 104                         | 6.7                             | —                                                       | 7.5                            | 0.62                                                    | 10.7                            | 0.88                                                    |
| 2zta                   | 2ahp               | C2                                            | 2                            | 66                          | 4.8                             | —                                                       | 5.8                            | 0.42                                                    | 5.8                             | 0.82                                                    |

\*In several cases, structure factors were not deposited for the modeled sequence, but for a variant with slightly different termini or a small number of substitutions.

<sup>†</sup>Maximum Phaser Translation Function Z score observed with 400 lowest energy models. For 2nzc and 2o1j, single-chain models all gave sterically disallowed solutions in Phaser searches. For several cases, the asymmetric unit spanned only a subset of the biological complex; phasing was only carried out with monomer structures extracted from the modeled complex structures.

<sup>‡</sup>Maximum fraction of residues automatically built and sequence-assigned with the Flex-Warp version of ARP/wARP; trials were carried out with the molecular replacement models with the three highest Phaser TFZ scores.
